# Supplementary material for: Deuterium equilibrium isotope effects in a supramolecular receptor for the hydrochalcogenide and halide anions
Source: Royal Society of Chemistry journal article supplement (doi:10.1039/d1ra05711a), 2021-01-01
Supplement: d1ra05711a1.pdf [file d1ra05711a1.pdf]

Supporting Information for:

**Deuterium Equilibrium Isotope Effects in a Supramolecular Receptor for Hydrosulfide**

Hazel A. Fargher, Russell A. Nickels, Thaís de Faria, Michael M. Haley,\* Michael D. Pluth,\* Darren W. Johnson\*

Department of Chemistry & Biochemistry, Materials Science Institute, and Knight Campus for Accelerating Scientific Impact, University of Oregon, Eugene, OR 97403-1253, United States

[haley@uoregon.edu](mailto:haley@uoregon.edu), [pluth@uoregon.edu](mailto:pluth@uoregon.edu), [dwj@uoregon.edu](mailto:dwj@uoregon.edu)

| <b>Table of Contents</b>                                                   | <b>Page</b> |
|----------------------------------------------------------------------------|-------------|
| 1. Synthesis                                                               | S2          |
| 2. NMR Spectra                                                             | S4          |
| 3. Competitive Titrations of <b>2<sup>H</sup></b> and <b>2<sup>D</sup></b> | S12         |
| 4. Competitive <sup>13</sup> C NMR Titration Representative Data           | S13         |
| 5. References                                                              | S15         |

## Synthesis.

**General Methods.** All reagents were purchased from commercial sources and used as received, unless otherwise noted. NMR spectra were acquired at room temperature on a Bruker Avance-III-HD 600 MHz ( $^1\text{H}$  600 MHz,  $^{13}\text{C}$  151 MHz,  $^{19}\text{F}$  565 MHz,  $^2\text{H}$  76.75 MHz) spectrometer with a Prodigy multinuclear broadband BBO CryoProbe.  $^1\text{H}$  and  $^{13}\text{C}$  chemical shifts ( $\delta$ ) are reported in ppm relative to residual  $\text{CHCl}_3$  ( $^1\text{H}$ : 7.26 ppm,  $^{13}\text{C}$ : 77.16 ppm),  $\text{CH}_3\text{CN}$  ( $^1\text{H}$ : 1.94 ppm,  $^{13}\text{C}$ : 118.26 ppm), or DMSO ( $^1\text{H}$ : 2.50 ppm,  $^{13}\text{C}$ : 39.52 ppm) shifts.  $^{19}\text{F}$  chemical shifts are referenced to  $\text{CFCl}_3$  ( $\delta = 0$  ppm) as an external standard.  $^2\text{H}$  chemical shifts are reported in ppm relative to residual  $\text{CDCl}_3$  (7.26 ppm),  $\text{CD}_3\text{CN}$  (1.94), or  $\text{DMSO-}d_6$  (2.50 ppm). High-resolution mass spectra (HRMS) were recorded on a Waters XEVO G2-SX mass spectrometer. Tetrabutylammonium hydrosulfide (TBASH),<sup>[1]</sup> 2,6-diiodo-4-trifluoromethylaniline,<sup>[2]</sup> 4-tertbutyl-2-((trimethylsilyl)ethynyl)aniline,<sup>[3]</sup> and host  $\mathbf{2}^{\text{H}}$ <sup>[4]</sup> were synthesized according to previous reports. *Note:* Hydrogen sulfide and related salts are highly toxic and should be handled carefully to avoid exposure.

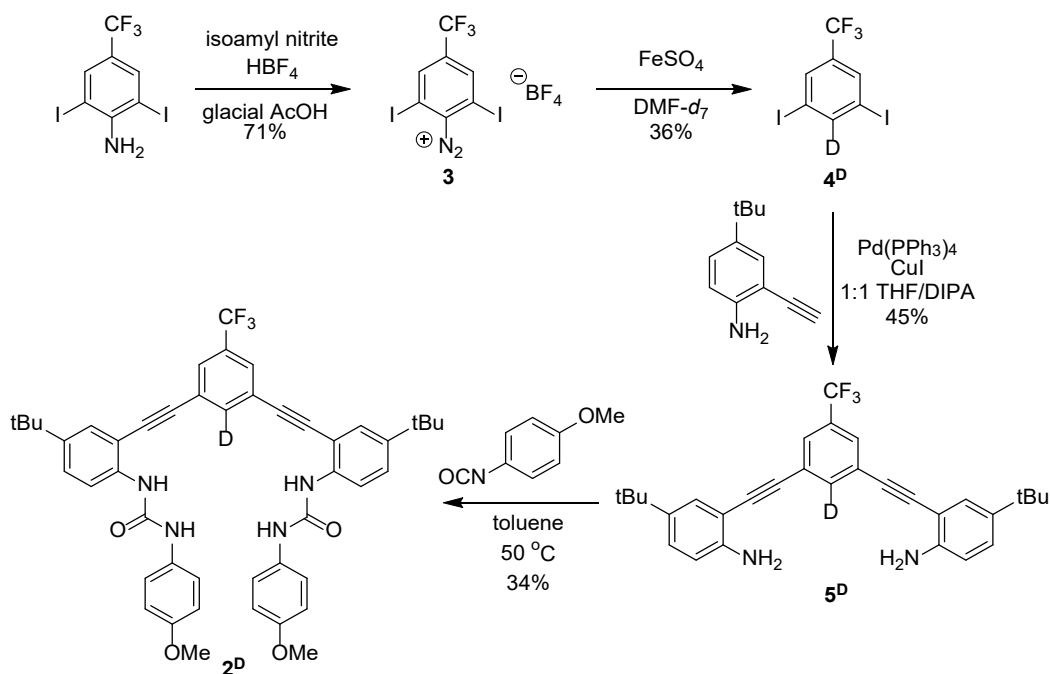

**Scheme S1.** Synthetic pathway to the selective deuteration of anion receptor  $\mathbf{2}^{\text{D}}$ .

**2,6-Diiodo-4-trifluoromethyl-diazonium tetrafluoroborate ( $\mathbf{3}$ ).** This preparation was adapted from previous reports.<sup>[5]</sup> A solution of 2,6-diiodo-4-trifluoromethylaniline<sup>[2]</sup> (0.25 g, 0.61 mmol), glacial AcOH (1.0 mL), and 48%  $\text{HBF}_4$  (0.18 mL) was stirred at  $25\text{ }^\circ\text{C}$ . Isoamyl nitrite (0.14 mL) was combined with glacial AcOH (2.0 mL) and added dropwise over 5 min to produce a bright yellow solution. After stirring the reaction mixture at  $25\text{ }^\circ\text{C}$  for 15 min, diethyl ether (2.0 mL) was slowly added. The resulting liquid was placed in a  $-20\text{ }^\circ\text{C}$  freezer for 16 h, and the solid product was isolated by vacuum filtration and washed with diethyl ether to afford  $\mathbf{3}$  (0.25 g, 0.48 mmol, 71%) as a bright yellow solid. *Note:* Caution should be observed when working with isoamyl nitrite or isolating diazonium salts as a solid as these compounds are known to be shock sensitive and explosive.<sup>[6,7]</sup>  $^1\text{H}$  NMR (600 MHz,  $\text{CD}_3\text{CN}$ )  $\delta$ : 8.59 (s, 2H).

$^{13}\text{C}$  NMR (151 MHz,  $\text{CD}_3\text{CN}$ )  $\delta$ : 140.2 (q,  $J = 34.7$ ), 139.7 (q,  $J = 3.0$ ), 133.1, 121.4 (q,  $J = 274.8$ ), 102.9.  $^{19}\text{F}$  (565 MHz,  $\text{CD}_3\text{CN}$ )  $\delta$ : 4.7, -151.8.

### 1,3-Diiodo-2-deutero-5-trifluoromethylbenzene ( $4^{\text{D}}$ )

This preparation was adapted from previous reports.<sup>[8]</sup> A solution of  $\text{FeSO}_4$  (0.54 g, 2.0 mmol) and  $\text{DMF-}d_7$  (10 mL) was allowed to stir for 15 min. A separate solution containing **2** (1.0 g, 2.0 mmol) dissolved in  $\text{DMF-}d_7$  (4 mL) was added dropwise over 10 min to the stirring solution. The solution was allowed to stir for an additional 15 min before adding water to precipitate a solid. The precipitate was isolated by vacuum filtration and washed with water to afford  $4^{\text{D}}$  (0.28 g, 0.71 mmol, 36%) as a tan solid.  $^1\text{H}$  NMR (600 MHz,  $\text{CDCl}_3$ )  $\delta$ : 7.91 (s, 2H).  $^{13}\text{C}$  NMR (151 MHz,  $\text{CDCl}_3$ )  $\delta$ : 148.3 (t,  $J = 27.2$ ),  $\delta$  133.7 (q,  $J = 33.7$ ),  $\delta$  133.7 (q,  $J = 1.5$ ),  $\delta$  121.9 (q,  $J = 273.8$ ),  $\delta$  94.6.  $^{19}\text{F}$  (565 MHz,  $\text{CDCl}_3$ )  $\delta$  -63.0.  $^2\text{H}$  (76.75 MHz,  $\text{CDCl}_3$ )  $\delta$  8.29. HRMS (TOF-MS-ASAP)  $[\text{M}]^+$  calc'd for  $\text{C}_7\text{H}_2\text{DF}_3\text{I}_2$  398.8339, found 398.8317.

### Deuterated dianiline intermediate ( $5^{\text{D}}$ )

This preparation was adapted from previous reports.<sup>[4]</sup> A suspension of 4-tertbutyl-2-((trimethylsilyl)ethynyl)aniline<sup>[3]</sup> (0.68 g, 2.4 mmol),  $\text{K}_2\text{CO}_3$  (1.90 g, 13.8 mmol), MeOH (20 mL), and  $\text{Et}_2\text{O}$  (10 mL) was stirred at 25 °C for 3 h. The suspension was diluted with water and extracted with  $\text{CH}_2\text{Cl}_2$  (15 mL, x3) and washed with brine (15 mL, x2). The organic layer was dried ( $\text{Na}_2\text{SO}_4$ ) and concentrated *in vacuo* to afford a dark brown oil. The oil was dissolved in THF (20 mL) and DIPA (20 mL) and purged with  $\text{N}_2$  for 40 min. The solution was cannulated into an  $\text{N}_2$ -purged solution of  $4^{\text{D}}$  (0.36 g, 0.92 mmol),  $\text{Pd}(\text{PPh}_3)_4$  (0.032 g, 0.046 mmol), CuI (0.0017 g, 0.0092 mmol), THF (20 mL), and *i*-PrNH<sub>2</sub> (20 mL). The solution was stirred for 18 h at 50 °C, cooled, and concentrated *in vacuo*. The resulting oil was dissolved in  $\text{CH}_2\text{Cl}_2$  and filtered through a 3 cm silica plug, which was washed with additional  $\text{CH}_2\text{Cl}_2$ . The filtrate was concentrated *in vacuo* and the resulting brown oil was purified by column chromatography (5:1 hexanes/ $\text{EtOAc}$ ) to afford  $5^{\text{D}}$  (0.20 g, 0.41 mmol, 45%) as a brown solid.  $^1\text{H}$  NMR (600 MHz,  $\text{CDCl}_3$ )  $\delta$ : 7.71 (s, 2H), 7.40, (d,  $J = 2.0$ , 2H), 7.24 (dd,  $J = 8.4$ , 2H), 6.70 (d,  $J = 8.4$ , 2H), 4.19 (s, 4H), 1.30 (s, 18H).  $^{13}\text{C}$  NMR (151 MHz,  $\text{CDCl}_3$ )  $\delta$ : 145.8, 141.2, 136.7 (t,  $J = 25.7$ ), 131.5 (q,  $J = 33.2$ ), 129.0, 128.0, 127.4 (q,  $J = 3$ ), 124.9, 124.6 (q,  $J = 273.3$ ), 114.6, 106.6, 92.1, 89.1, 34.1, 31.5.  $^{19}\text{F}$  (565 MHz,  $\text{CDCl}_3$ ) -63.1.  $^2\text{H}$  (76.75 MHz,  $\text{CDCl}_3$ )  $\delta$ : 7.90. HRMS (TOF-MS-ASAP)  $[\text{M}+\text{H}]^+$  calc'd for  $\text{C}_{31}\text{H}_{31}\text{DN}_2\text{F}_3$  490.2580, found 490.2549.

### Deuterated arylethynyl bisurea host ( $2^{\text{D}}$ )

This preparation was adapted from previous reports.<sup>[4]</sup> All glassware was dried in a 110 °C oven overnight. A round bottom flask was charged with dry toluene (100 mL) and  $5^{\text{D}}$  (0.20 g, 0.41 mmol). 4-Methoxyphenyl isocyanate (0.16 mL, 1.2 mmol) was added dropwise, and the solution was stirred for 46 h at 50 °C. The reaction became cloudy upon completion, and the precipitate was collected by vacuum filtration to afford  $2^{\text{D}}$  (0.11 g, 0.14 mmol, 34%).  $^1\text{H}$  NMR (600 MHz, 10%  $\text{DMSO-}d_6/\text{CD}_3\text{CN}$ )  $\delta$ : 8.87 (s, 2H), 8.08 (d,  $J = 8.8$ , 2H), 7.99 (s, 2H), 7.96 (s, 2H), 7.56 (d,  $J = 2.2$ , 2H), 7.45 (dd,  $J = 8.8$ , 2H), 7.38 (d,  $J = 8.9$ , 4H), 6.84 (d,  $J = 8.9$ , 4H), 3.72 (s, 6H), 1.31 (s, 18H).  $^{13}\text{C}$  NMR (151 MHz, 10%  $\text{DMSO-}d_6/\text{CD}_3\text{CN}$ )  $\delta$ : 156.2, 153.9, 145.9, 139.5, 133.5, 131.8 (q,  $J = 32.2$ ), 129.8, 128.7 (q,  $J = 3.6$ ), 128.3, 125.4, 124.5 (q,  $J = 272.8$ ), 121.8, 120.7, 114.9, 111.6, 93.2, 89.2, 55.9, 34.8, 31.4.  $^{19}\text{F}$  (565 MHz, 10%  $\text{DMSO-}d_6/\text{CD}_3\text{CN}$ )  $\delta$ : -63.2.  $^2\text{H}$  (76.75 MHz, 10%  $\text{DMSO-}d_6/\text{CD}_3\text{CN}$ )  $\delta$ : 8.28. HRMS (TOF-MS-ASAP)  $[\text{M}+\text{H}]^+$  calc'd for  $\text{C}_{47}\text{H}_{45}\text{DN}_4\text{O}_4\text{F}_3$  788.3534, found 788.3543.

## NMR Spectra.

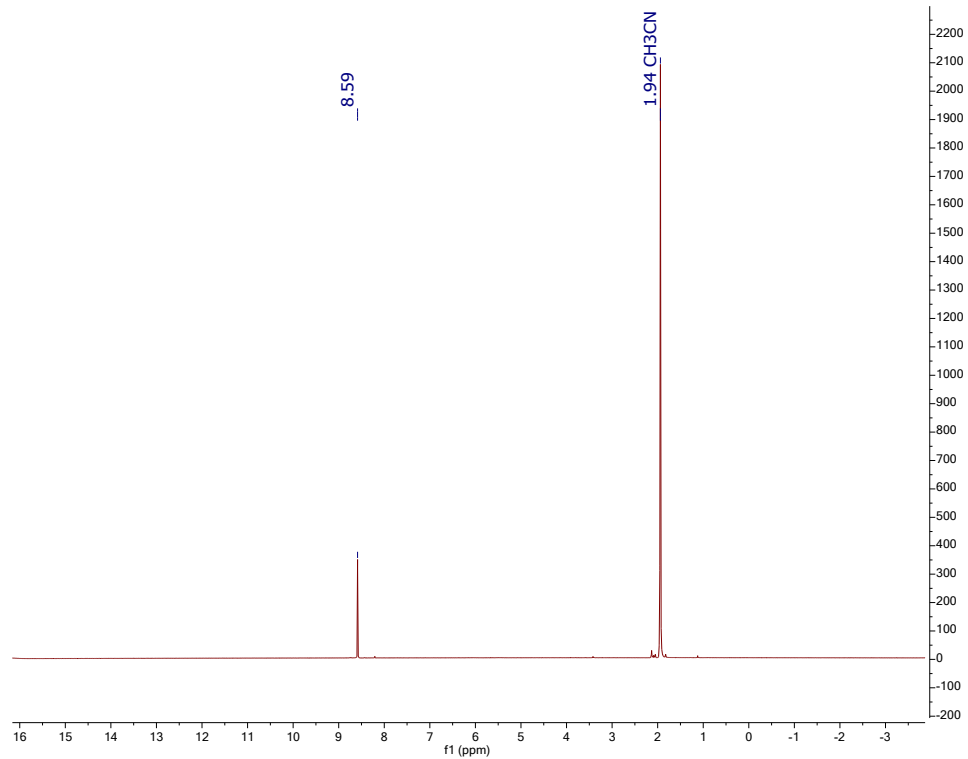

Figure S1.  $^1\text{H}$  NMR spectrum of **3** in  $\text{CD}_3\text{CN}$ .

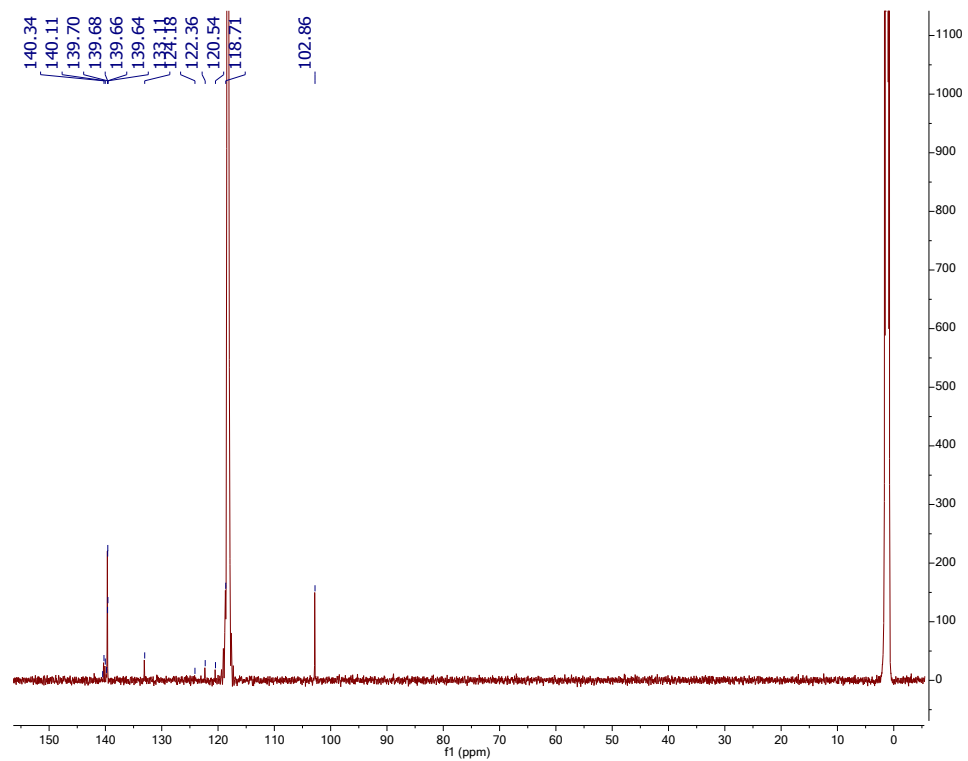

Figure S2.  $^{13}\text{C}\{^1\text{H}\}$  NMR spectrum of **3** in  $\text{CD}_3\text{CN}$ .

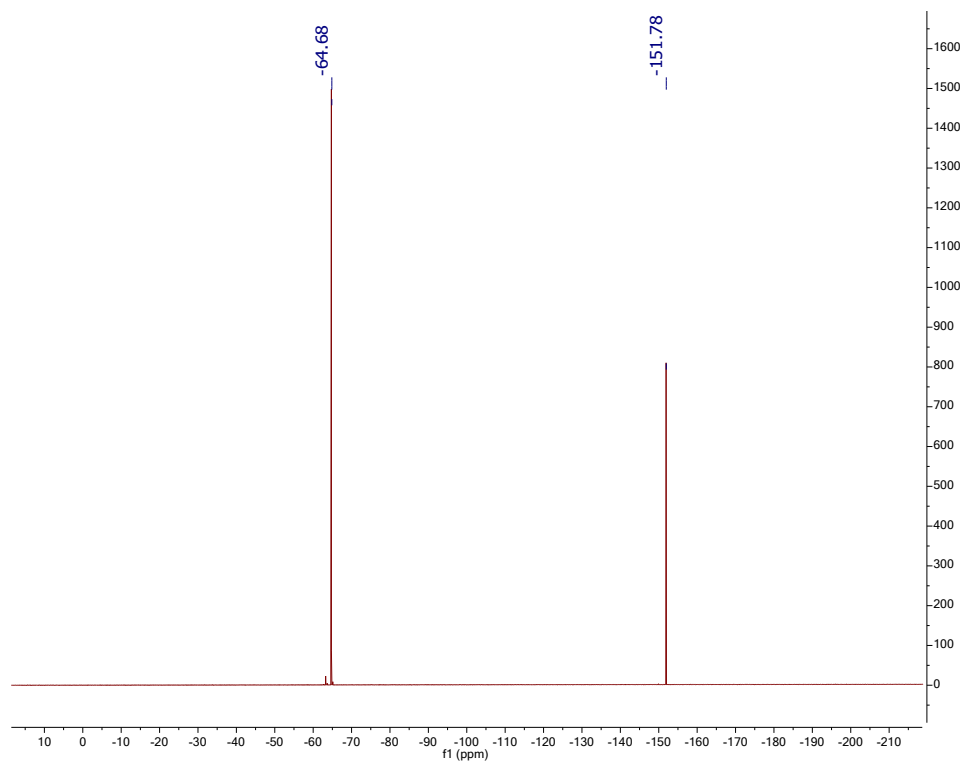

Figure S3.  $^{19}\text{F}$  NMR spectrum of **3** in  $\text{CD}_3\text{CN}$ .

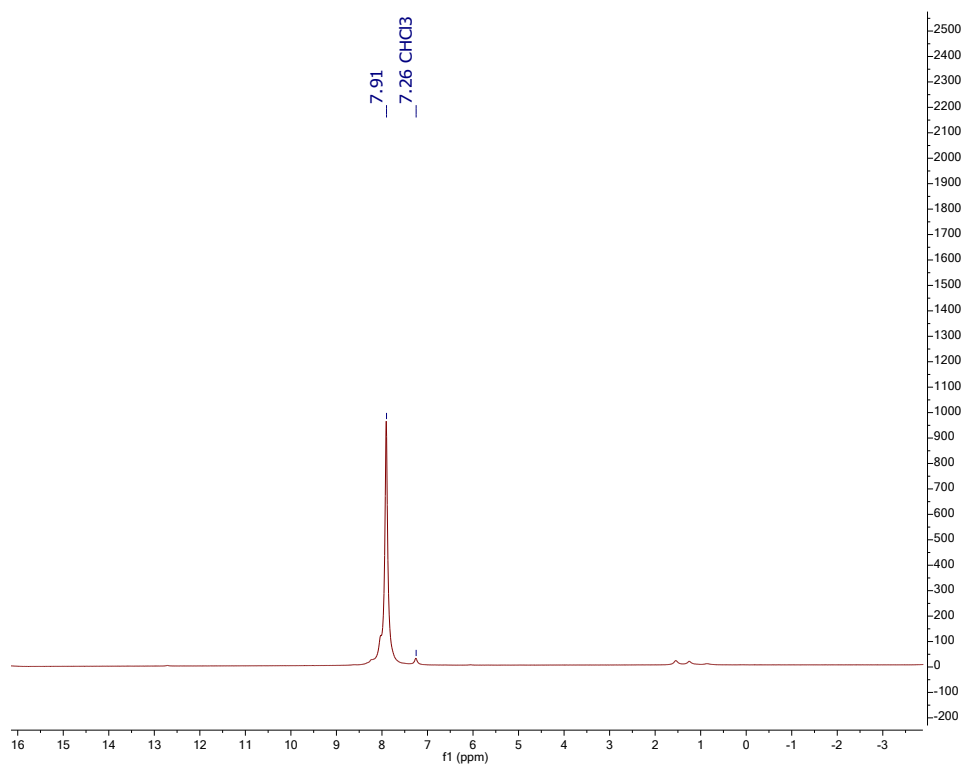

Figure S4.  $^1\text{H}$  NMR spectrum of **4<sup>D</sup>** in  $\text{CDCl}_3$ .

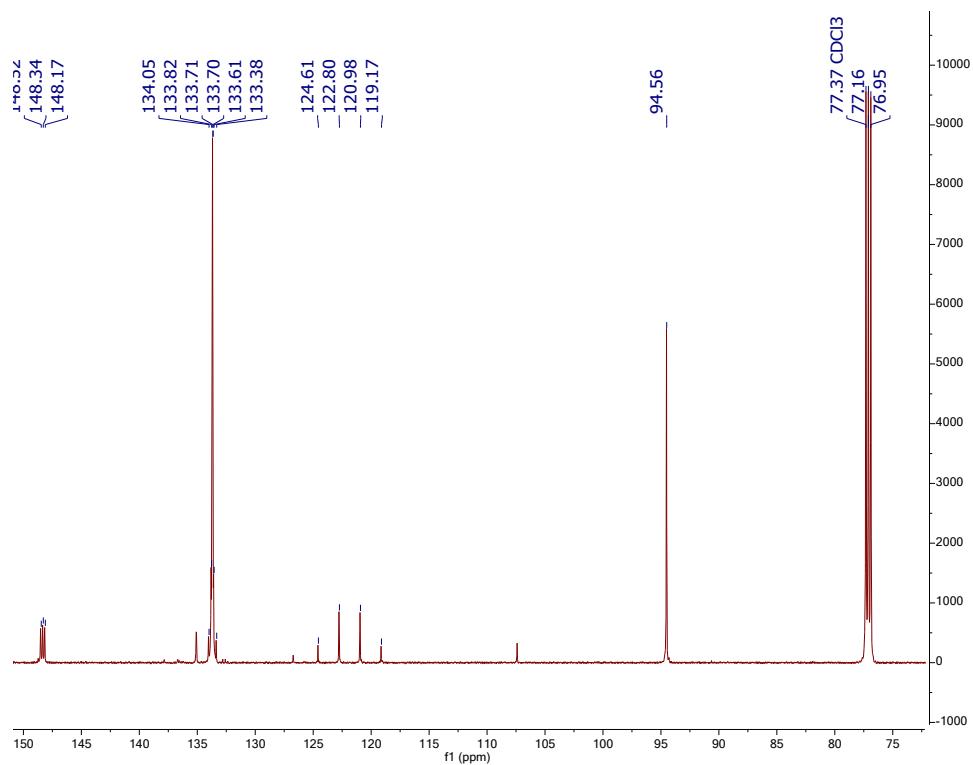

Figure S5.  $^{13}\text{C}\{^1\text{H}\}$  NMR spectrum of  $4^{\text{P}}$  in  $\text{CDCl}_3$ .

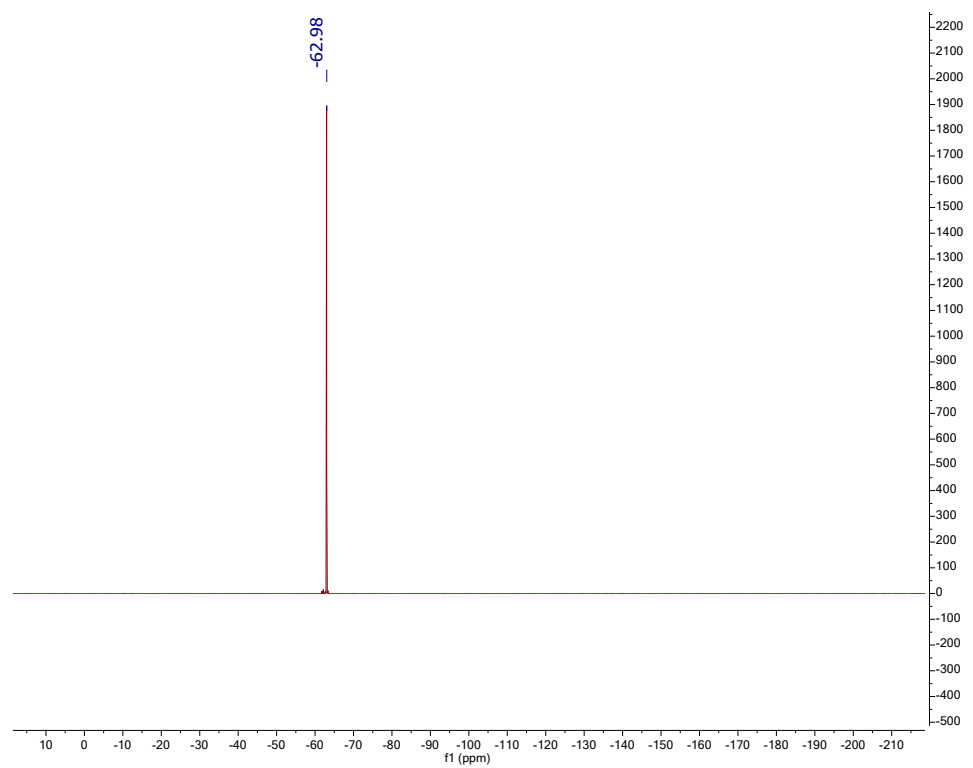

Figure S6.  $^{19}\text{F}$  NMR spectrum of  $4^{\text{P}}$  in  $\text{CDCl}_3$ .

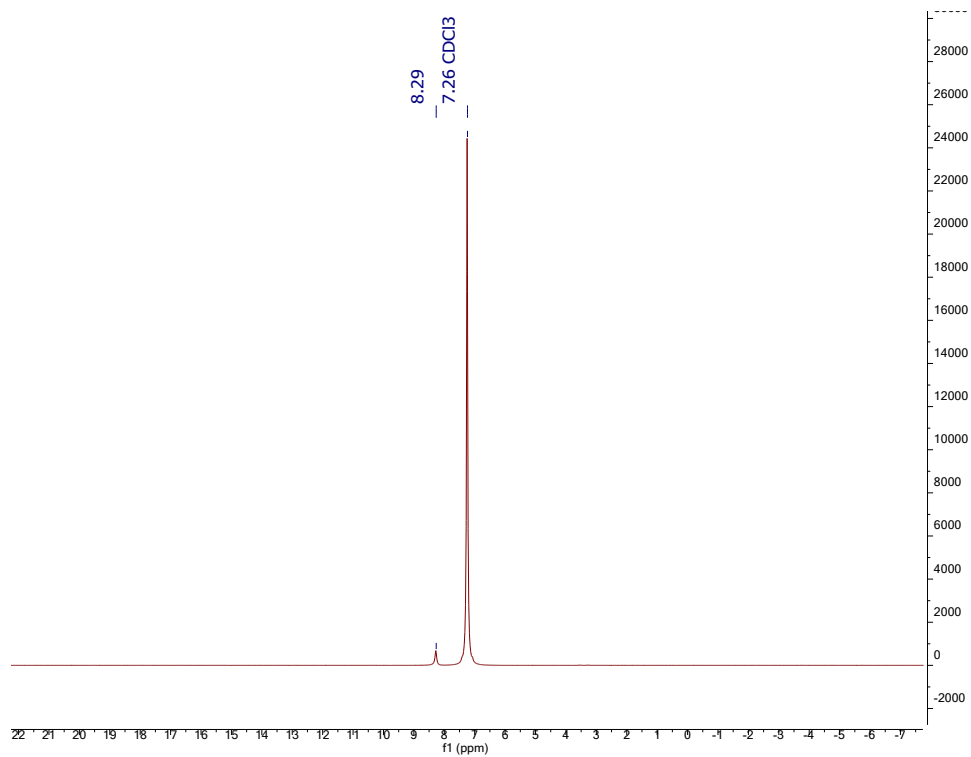

Figure S7. <sup>2</sup>H NMR spectrum of **4<sup>D</sup>** in CHCl<sub>3</sub>.

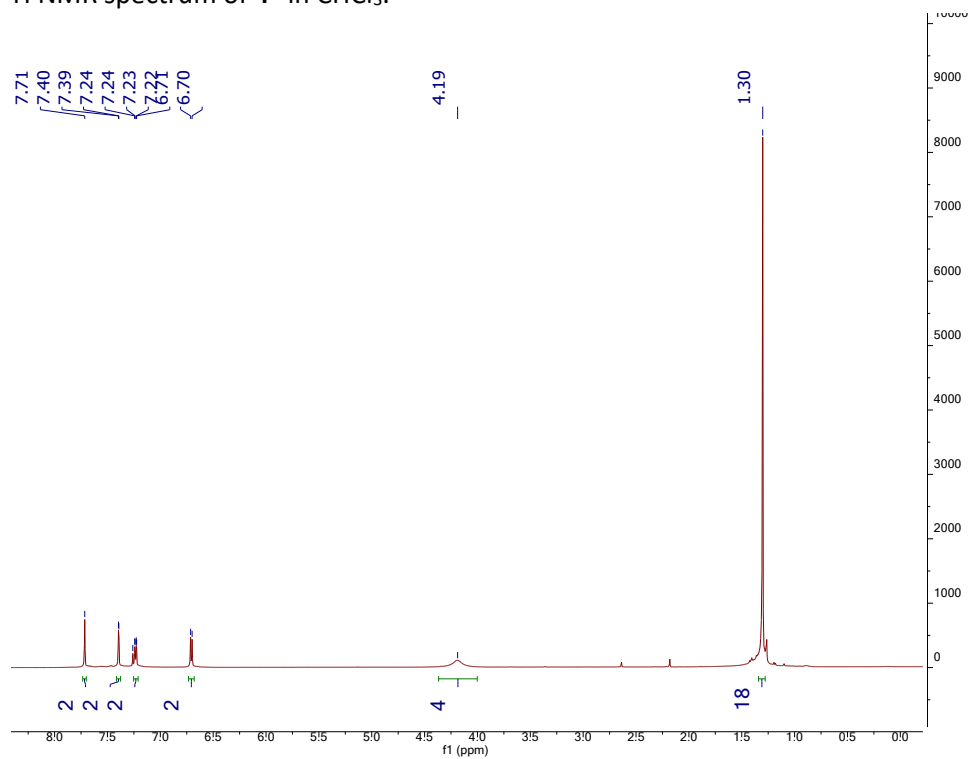

Figure S8. <sup>1</sup>H NMR spectrum of **5<sup>D</sup>** in CDCl<sub>3</sub>.

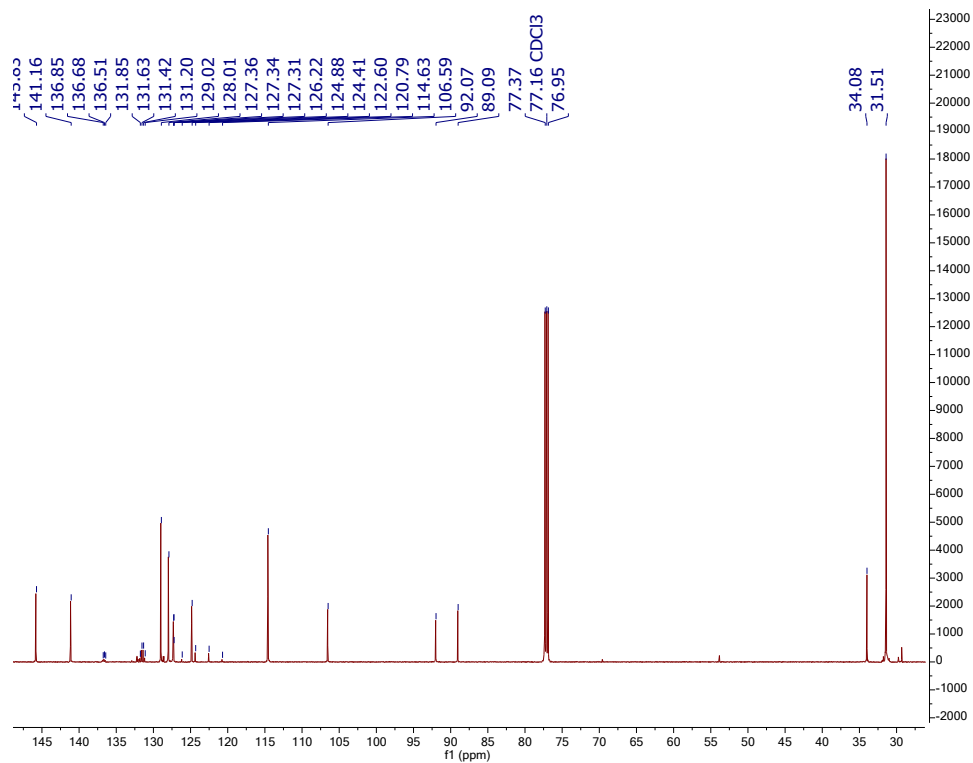

Figure S9.  $^{13}\text{C}\{^1\text{H}\}$  NMR spectrum of  $5^{\text{P}}$  in  $\text{CDCl}_3$ .

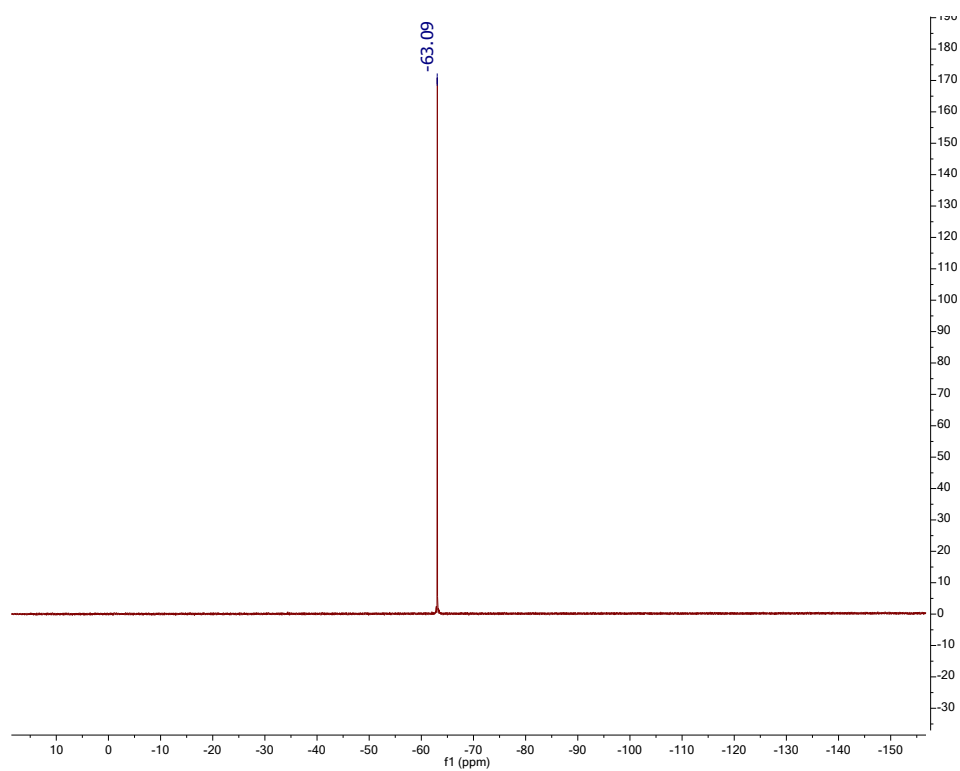

Figure S10.  $^{19}\text{F}$  NMR spectrum of  $5^{\text{P}}$  in  $\text{CDCl}_3$ .



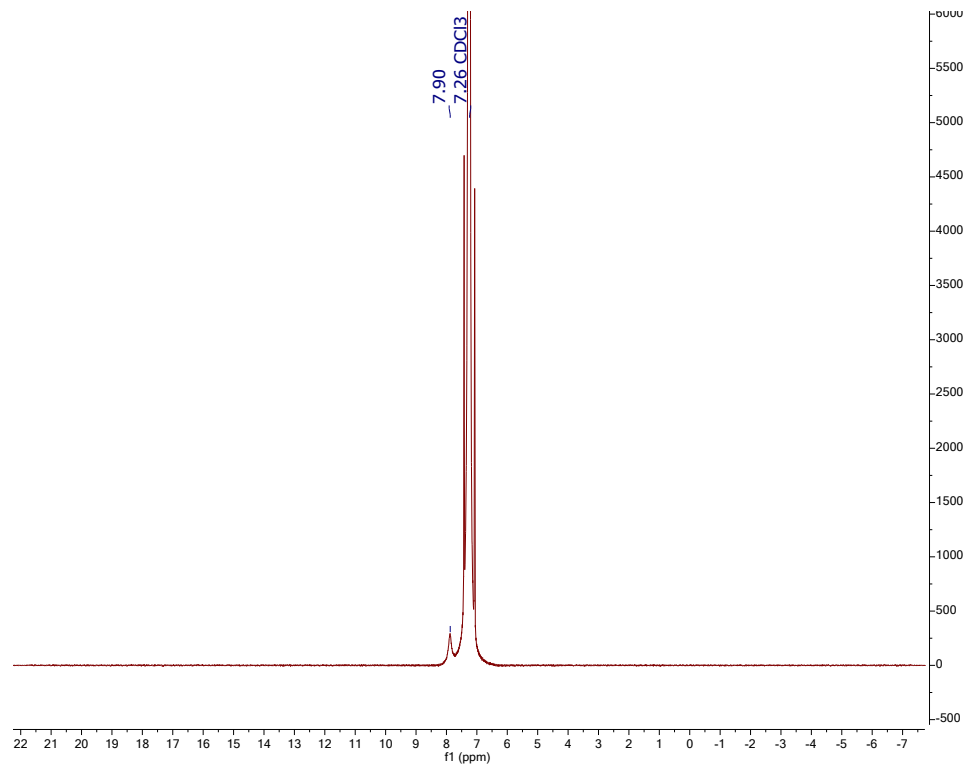

Figure S11.  $^2\text{H}$  NMR spectrum of **5<sup>D</sup>** in  $\text{CHCl}_3$ .

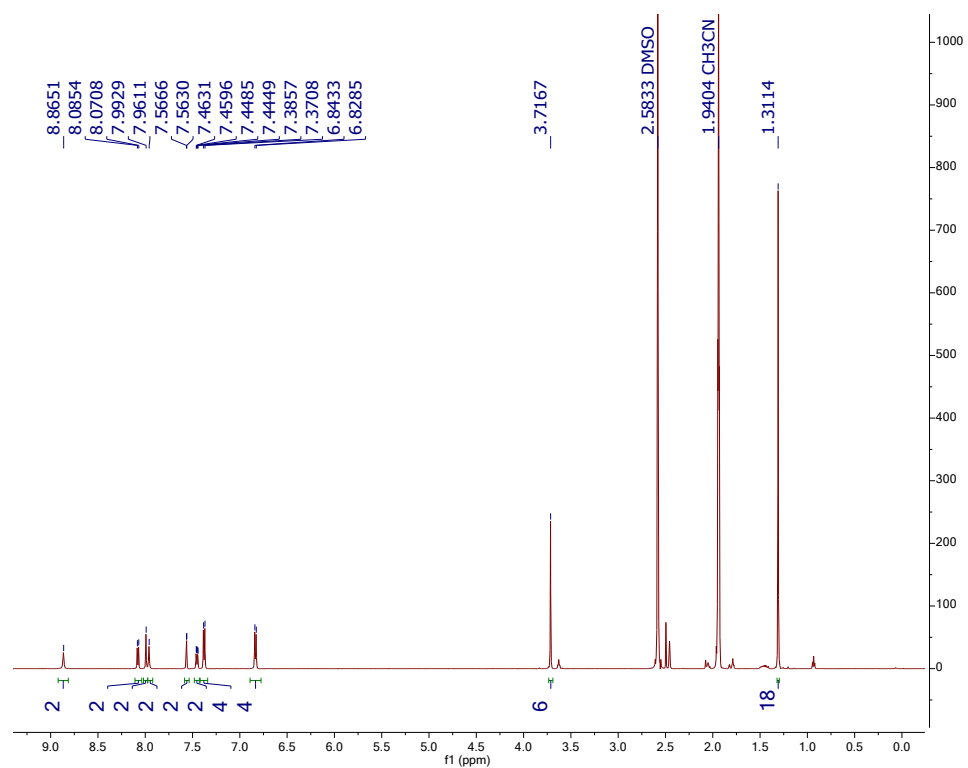

Figure S12.  $^1\text{H}$  NMR spectrum of **2<sup>D</sup>** in 10%  $\text{DMSO-}d_6/\text{CD}_3\text{CN}$ .

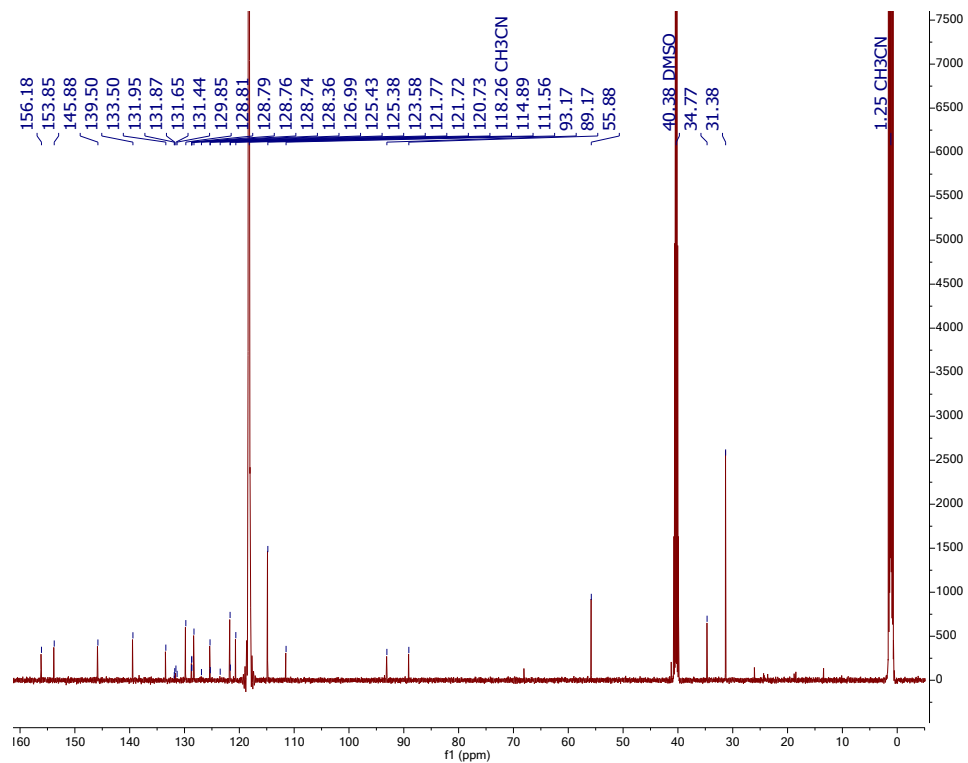

Figure S13.  $^{13}\text{C}\{^1\text{H}\}$  NMR spectrum of  $2^{\text{D}}$  in 10% DMSO- $d_6$ /CD $_3$ CN.

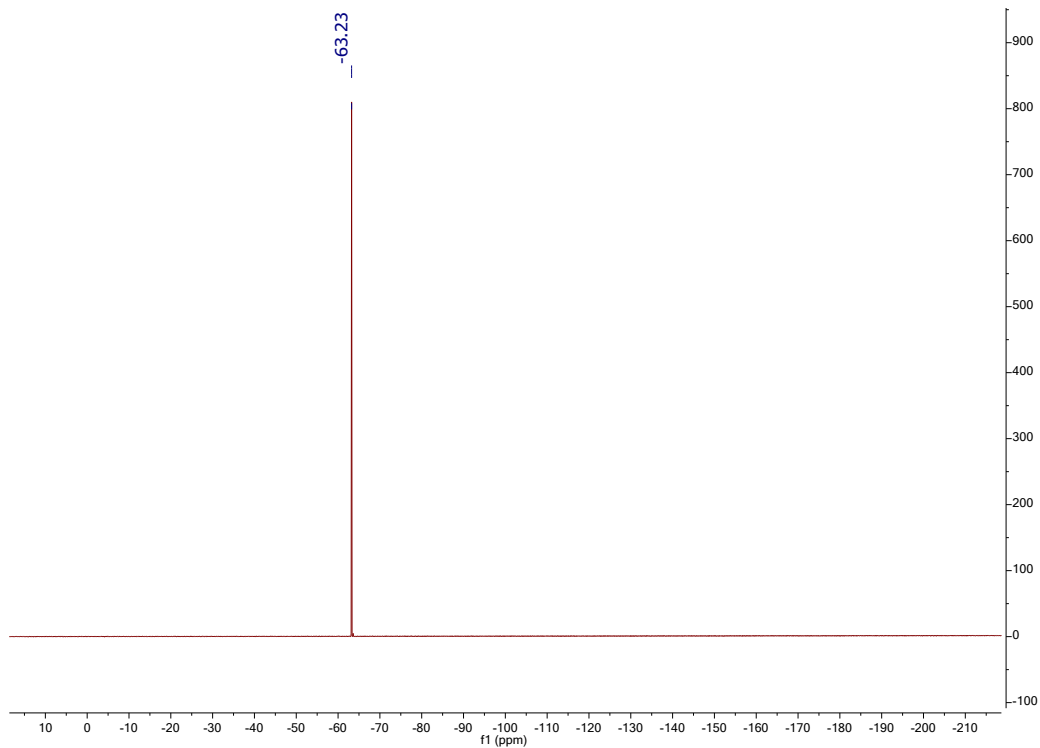

Figure S14.  $^{19}\text{F}$  NMR spectrum of  $2^{\text{D}}$  in 10% DMSO- $d_6$ /CD $_3$ CN.

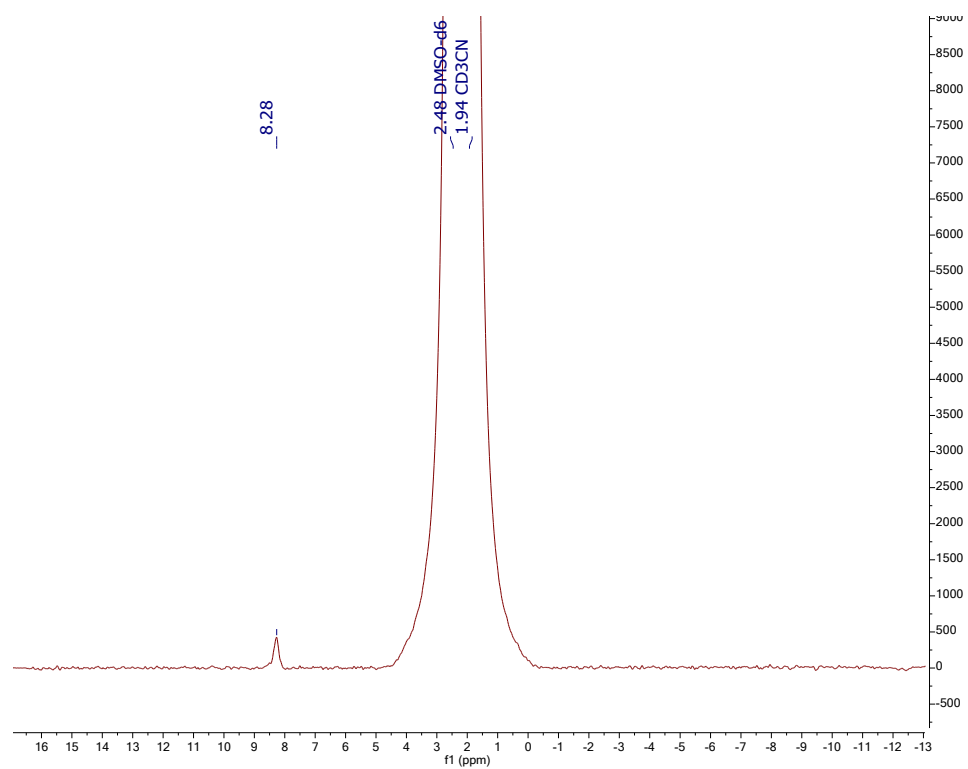

Figure S15.  $^2\text{H}$  NMR spectrum of  $2^{\text{D}}$  in 10% DMSO/ $\text{CH}_3\text{CN}$ .

## Competitive Titration of **2<sup>H</sup>** and **2<sup>D</sup>**.

**General Methods.** Samples were prepared under an inert atmosphere using an Innovative Atmospheres N<sub>2</sub>-filled glovebox. CD<sub>3</sub>CN and DMSO-*d*<sub>6</sub> were distilled from calcium hydride under reduced pressure, deoxygenated by purging with N<sub>2</sub> and stored over 4 Å molecular sieves in an inert atmosphere glove box. Tetrabutylammonium chloride (TBACl) and tetrabutylammonium bromide (TBABr) were recrystallized by layering an anhydrous THF solution under anhydrous Et<sub>2</sub>O. Tetrabutylammonium hydrosulfide (TBASH) was synthesized according to previous reports.<sup>[1]</sup> *Note:* Hydrogen sulfide and related salts are highly toxic and should be handled carefully to avoid exposure.

### General Procedure for NMR Titrations.

#### **Method A.**

A solution of **2<sup>H</sup>** and **2<sup>D</sup>** in 10% DMSO-*d*<sub>6</sub>/CD<sub>3</sub>CN (combined concentration between 5.71 and 13.46 mM) was prepared and 500 μL was added to a septum-sealed NMR tube. A stock solution of guest (TBASH, TBACl, or TBABr) was prepared in 10% DMSO-*d*<sub>6</sub>/CD<sub>3</sub>CN (54.69 – 223.09 mM). Aliquots of the guest solution were added to the NMR tube using Hamilton gas-tight syringes, and <sup>13</sup>C NMR spectra were recorded at 25°C after each addition of guest. The Δδ of the C<sup>ab</sup>, C<sup>1</sup>, and C<sup>2</sup> of **2<sup>H</sup>** and **2<sup>D</sup>** were used to follow the progress of the titration, and DEIE were determined using the Perrin method.<sup>[9]</sup>

#### **Method B.**

A solution of **2<sup>H</sup>** and **2<sup>D</sup>** in 10% DMSO-*d*<sub>6</sub>/CD<sub>3</sub>CN (combined concentration between 4.65 and 6.04 mM) was prepared and 500 μL aliquots were added to four J-young NMR tubes. A stock solution of TBASH was prepared in CD<sub>3</sub>CN (47.18 – 81.29 mM). For each point in the titration, TBASH stock solution and DMSO-*d*<sub>6</sub> were added to a new solution of **2<sup>H</sup>** and **2<sup>D</sup>** inside an N<sub>2</sub>-glovebox shortly before obtaining a <sup>13</sup>C NMR spectra. The Δδ of the C<sup>ab</sup>, C<sup>1</sup>, and C<sup>2</sup> of **2<sup>H</sup>** and **2<sup>D</sup>** were used to follow the progress of the titration, and DEIE were determined using the Perrin method.<sup>[9]</sup>

### Competitive $^{13}\text{C}$ NMR Titration Representative Data.

**Table S1.** Representative competitive titration between  $2^{\text{H}}$  and  $2^{\text{D}}$  with  $\text{Cl}^-$  in 10%  $\text{DMSO-}d_6/\text{CD}_3\text{CN}$  at  $25^\circ\text{C}$ .

| Entry | $V_{\text{Guest}}$<br>( $\mu\text{L}$ ) | $[2^{\text{H}}]$<br>(mM) | $[2^{\text{D}}]$<br>(mM) | $[\text{Cl}^-]$<br>(mM) | $\delta C^{\text{ab}}$<br>( $2^{\text{H}}$ )<br>(ppm) | $\delta C^{\text{ab}}$<br>( $2^{\text{D}}$ )<br>(ppm) | $\delta C^1$<br>( $2^{\text{H}}$ )<br>(ppm) | $\delta C^1$<br>( $2^{\text{D}}$ )<br>(ppm) | $\delta C^2$<br>( $2^{\text{H}}$ )<br>(ppm) | $\delta C^2$<br>( $2^{\text{D}}$ )<br>(ppm) |
|-------|-----------------------------------------|--------------------------|--------------------------|-------------------------|-------------------------------------------------------|-------------------------------------------------------|---------------------------------------------|---------------------------------------------|---------------------------------------------|---------------------------------------------|
| 1     | 0                                       | 7.4                      | 2.8                      | 0                       | 125.5158                                              | 125.4206                                              | 93.2006                                     | 93.1679                                     | 89.1431                                     | 89.1625                                     |
| 2     | 10                                      | 7.2                      | 2.7                      | 1.5                     | 125.4586                                              | 125.3627                                              | 93.2448                                     | 93.2117                                     | 89.210                                      | 89.1440                                     |
| 3     | 50                                      | 6.5                      | 2.5                      | 8.0                     | 125.2459                                              | 125.1484                                              | 93.4583                                     | 93.4213                                     | 89.0492                                     | 89.0715                                     |
| 4     | 60                                      | 5.8                      | 2.2                      | 14.4                    | 125.1863                                              | 125.0894                                              | 93.5353                                     | 93.4970                                     | 89.0370                                     | 89.0597                                     |
| 5     | 200                                     | 4.3                      | 1.3                      | 28.4                    | 125.1896                                              | 125.0942                                              | 93.5570                                     | 93.5180                                     | 89.0795                                     | 89.1019                                     |

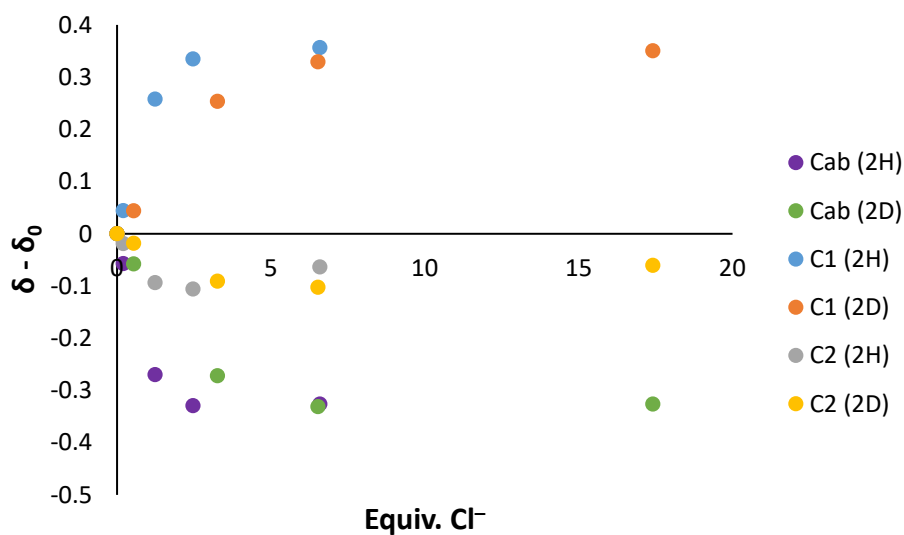

**Figure S16.** Binding isotherm for  $\text{Cl}^-$  binding with a mixture of  $2^{\text{H}}$  and  $2^{\text{D}}$  in 10%  $\text{DMSO-}d_6/\text{CD}_3\text{CN}$  at  $25^\circ\text{C}$ .

**Table S2.** Representative competitive titration between  $2^H$  and  $2^D$  with  $Br^-$  in 10% DMSO- $d_6$ /CD $_3$ CN at 25°C.

| Entry | $V_{Guest}$<br>( $\mu$ L) | $[2^H]$<br>(mM) | $[2^D]$<br>(mM) | $[Br^-]$<br>(mM) | $\delta C^{ab}$<br>( $2^H$ )<br>(ppm) | $\delta C^{ab}$<br>( $2^D$ )<br>(ppm) | $\delta C^1$<br>( $2^H$ )<br>(ppm) | $\delta C^1$<br>( $2^D$ )<br>(ppm) | $\delta C^2$<br>( $2^H$ )<br>(ppm) | $\delta C^2$<br>( $2^D$ )<br>(ppm) |
|-------|---------------------------|-----------------|-----------------|------------------|---------------------------------------|---------------------------------------|------------------------------------|------------------------------------|------------------------------------|------------------------------------|
| 1     | 0                         | 9.4             | 4.1             | 0                | 125.5253                              | 125.4301                              | 93.2145                            | 93.1818                            | 89.1588                            | 89.1780                            |
| 2     | 5                         | 9.3             | 4.0             | 1.1              | 125.4977                              | 125.4008                              | 93.2280                            | 93.1959                            | 89.1571                            | 89.1772                            |
| 3     | 10                        | 9.1             | 3.9             | 3.2              | 125.4451                              | 125.3496                              | 93.2538                            | 93.2223                            | 89.1546                            | 89.1743                            |
| 4     | 60                        | 8.1             | 3.5             | 14.1             | 125.2864                              | 125.1897                              | 93.3491                            | 93.3152                            | 89.1485                            | 89.1692                            |
| 5     | 200                       | 5.8             | 2.5             | 37.5             | 125.1987                              | 125.1029                              | 93.4268                            | 93.3909                            | 89.1687                            | 89.1896                            |
| 6     | 500                       | 3.5             | 1.5             | 62.6             | 125.1856                              | 125.0898                              | 93.4606                            | 93.4253                            | 89.2015                            | 89.2217                            |

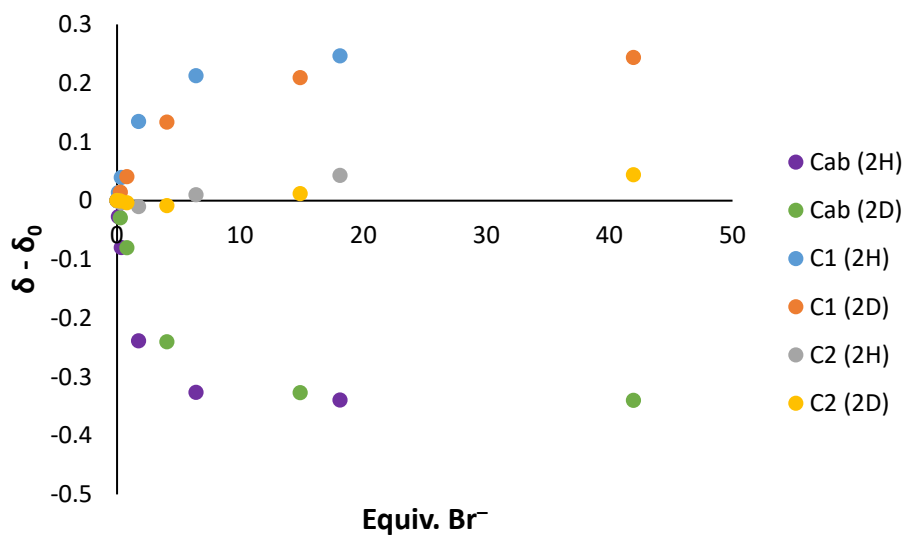

**Figure S17.** Binding isotherm for  $Br^-$  binding with a mixture of  $2^H$  and  $2^D$  in 10% DMSO- $d_6$ /CD $_3$ CN at 25°C.

## References

- [1] M. D. Hartle, D. J. Meininger, L. N. Zakharov, Z. J. Tonzetich, M. D. Pluth, *Dalton Trans.* **2015**, *44*, 19782–19785.
- [2] D. M. Lindsay, W. Dohle, A. E. Jensen, F. Kopp, P. Knochel, *Org. Lett.* **2002**, *4*, 1819–1822.
- [3] C. N. Carroll, O. B. Berryman, C. A. Johnson, L. N. Zakharov, M. M. Haley, D. W. Johnson, *Chem. Commun.* **2009**, 2520–2522.
- [4] H. A. Fargher, N. Lau, H. C. Richardson, P. H.-Y. Cheong, M. M. Haley, M. D. Pluth, D. W. Johnson, *J. Am. Chem. Soc.* **2020**, *142*, 8243–8251.
- [5] B. W. Tresca, A. C. Brueckner, M. M. Haley, P. H.-Y. Cheong, D. W. Johnson, *J. Am. Chem. Soc.* **2017**, *139*, 3962–3965.
- [6] M. K. Bernard, *J. Chem. Educ.* **2010**, *87*, 583–583.
- [7] J. D. Firth, I. J. S. Fairlamb, *Org. Lett.* **2020**, *22*, 7057–7059.
- [8] F. W. Wassmundt, W. F. Kiesman, *J. Org. Chem.* **1995**, *60*, 1713–1719.
- [9] C. L. Perrin, M. A. Fabian, *Anal. Chem.* **1996**, *68*, 2127–2134.
